# Supplementary material for: Anti-Inflammatory Activity of Mulberry Leaf Flavonoids In Vitro and In Vivo
Source: MDPI journal article supplement (doi:10.3390/ijms23147694), 2022-07-12
Supplement: s1 [file s1]

**Table S2.** Standard for Evaluation of the Disease Activity Index (DAI)<sup>a,b,c</sup>

| <b>Weight loss (%)</b> | <b>Stool consistency</b>      | <b>Blood</b>                    | <b>Score</b> |
|------------------------|-------------------------------|---------------------------------|--------------|
| 0                      | Normal stools                 | Negative hemocult (no bleeding) | 0            |
| 1-5                    | Loose stools but still formed | Negative hemocult               | 1            |
| 5-10                   | Loose stools                  | Positive hemocult (slight)      | 2            |
| 10-15                  | Darrhea (slight)              | Positive hemocult               | 3            |
| >15                    | Watery diarrhea               | Gross bleeding                  | 4            |

<sup>a</sup>DAI is calculated as the sum of weight loss, stool consistency and hematochezia.

<sup>b</sup>Body weight loss is the percentage difference between the initial body weight (day 0) and the body weight on any particular day.

<sup>c</sup>Normal stools: well-formed stool; loose stools: pasty stool that does not stick to the anus; diarrhea: liquid stools that adheres to the anus.
