# Supplementary material for: Anti-Inflammatory Activity of Mulberry Leaf Flavonoids In Vitro and In Vivo
Source: MDPI journal article supplement (doi:10.3390/ijms23147694), 2022-07-12
Supplement: s1 [file s1]

Table S3. Standard for Evaluation of Histological Injury.

| Feature                  | Description                                                                           | Score |
|--------------------------|---------------------------------------------------------------------------------------|-------|
| Inflammation             | Normal                                                                                | 0     |
|                          | Mild                                                                                  | 1     |
|                          | Moderate                                                                              | 2     |
|                          | Severe                                                                                | 3     |
| Mucosal injury           | Normal                                                                                | 0     |
|                          | Mucous layer                                                                          | 1     |
|                          | Submucosa                                                                             | 2     |
|                          | Muscularis and serosa                                                                 | 3     |
| Glands                   | Normal                                                                                | 0     |
|                          | Minimal: rare gland dilatation                                                        | 1     |
|                          | Mild: multifocal gland dilatation                                                     | 2     |
|                          | Moderate: multifocal gland dilatation with abscessation and occasional loss of glands | 3     |
| Area of section affected | None                                                                                  | 0     |
|                          | <10%                                                                                  | 1     |
|                          | 10–25%                                                                                | 2     |
|                          | 26–50%                                                                                | 3     |
|                          | >50%                                                                                  | 4     |
