# Supplementary material for: Anti-Inflammatory Activity of Mulberry Leaf Flavonoids In Vitro and In Vivo
Source: MDPI journal article supplement (doi:10.3390/ijms23147694), 2022-07-12
Supplement: s1 [file s1]

**Table S1.** Putatively identified substances among MLFs based on a metabolomics analysis.

| Compound name                                | Retention time/min | Detected mass (ESI+) | Ion types | MS/MS fragments         |
|----------------------------------------------|--------------------|----------------------|-----------|-------------------------|
| (Z)-Resveratrol 4'-glucoside                 | 9.27               | 391.1396             | M+H       | 229, 149, 135           |
| Aesculin 1                                   | 7.68               | 341.0868             | M+H       | 179, 133, 123           |
| Aesculin 2                                   | 7.12               | 341.088              | M+H       | 179, 133, 123           |
| Chlorogenic acid 1                           | 8.45               | 355.1028             | M+H       | 163, 145, 117, 89       |
| Cis-Mulberroside A                           | 8.73               | 569.1868             | M+H       | 407, 245, 227, 181, 135 |
| Butin                                        | 21.76              | 273.0755             | M+H       | 137, 81                 |
| Loureirin B                                  | 20.88              | 317.1382             | M+H       | 299, 167, 149, 121      |
| Kaempferol <sup>a</sup>                      | 22.32              | 287.0548             | M+H       | 287, 153, 135, 107      |
| Kaempferol 3-(6"-malonylglucoside)           | 22.88              | 535.1085             | M+H       | 287, 159, 135           |
| Kaempferol 3-O-diglucoside 1                 | 13.95              | 611.1607             | M+H       | 449, 287                |
| Kaempferol 3-O-diglucoside 2                 | 9.82               | 611.1614             | M+H       | 449, 287                |
| Kaempferol 3-O-diglucoside 3                 | 13.03              | 611.1622             | M+H       | 449, 287                |
| Kaempferol 3-O-diglucoside 4                 | 16.31              | 611.1623             | M+H       | 449, 287                |
| Kaempferol 3-O-diglucoside 5                 | 15.42              | 633.1445             | M+Na      | 633, 347                |
| Kaempferol 3-O-diglucoside isomer 1          | 10.27              | 611.1606             | M+H       | 449, 287                |
| Kaempferol 3-O-diglucoside isomer 2          | 10.84              | 611.1616             | M+H       | 449, 287                |
| Kaempferol 3-O-diglucoside isomer 3          | 8.68               | 611.1622             | M+H       | 449, 287                |
| Kaempferol 3-O-diglucoside isomer 4          | 13.14              | 611.1626             | M+H       | 449, 287                |
| Kaempferol 3-O-dirhamnosylglucoside          | 17.66              | 741.2248             | M+H       | 595, 449, 287           |
| Kaempferol 3-O-rutinoside 1                  | 21.82              | 595.1658             | M+H       | 449, 287                |
| Kaempferol 3-O-rhamnosyldiglucoside          | 12.3               | 795.1751             | M+H       | 644                     |
| Kaempferol 3-O-rhamnosyldiglucoside isomer 1 | 8.644              | 757.2204             | M+H       | 611, 449, 287           |
| Kaempferol 3-O-rhamnosyldiglucoside isomer 2 | 10.58              | 757.2208             | M+H       | 611, 449, 287           |
| Kaempferol-3-O-glucoside <sup>a</sup>        | 17.47              | 449.1077             | M+H       | 287                     |
| Kaempferol glucoside 1                       | 21.54              | 449.1082             | M+H       | 287                     |
| Kaempferol glucoside 2                       | 9.24               | 449.1085             | M+H       | 287                     |
| Quercetin <sup>a</sup>                       | 14.65              | 303.0496             | M+H       | 257, 229, 165, 153, 137 |
| Quercetin 3-(6"-malonyl-glucoside)           | 19.95              | 551.1037             | M+H       | 303, 159, 127           |
| Quercetin 3-O-dirhamnosylglucoside 1         | 12.71              | 757.2185             | M+H       | 611, 465, 303           |
| Quercetin 3-O-dirhamnosylglucoside 2         | 15.42              | 757.2191             | M+H       | 611, 465, 303           |
| Quercetin 3-O-dirhamnosylglucoside 3         | 9.85               | 757.2192             | M+H       | 611, 465, 303           |
| Quercetin 3-O-dirhamnosylglucoside 4         | 16.04              | 757.2195             | M+H       | 611, 465, 303           |
| Quercetin 3-O-dirhamnosylglucoside isomer 1  | 12.28              | 757.219              | M+H       | 611, 465, 303           |
| Quercetin 3-O-dirhamnosylglucoside isomer 2  | 11.76              | 757.2207             | M+H       | 611, 465, 303           |
| Quercetin-3-O-rutinoside isomer 1            | 12.57              | 611.1608             | M+H       | 611, 465, 303           |

|                                      |       |          |      |               |
|--------------------------------------|-------|----------|------|---------------|
| Quercetin-3-O-rutinoside isomer 2    | 14.99 | 611.1614 | M+H  | 465, 303      |
| Quercetin-3-O-rutinoside isomer 3    | 11.73 | 611.1621 | M+H  | 465, 303      |
| Quercetin 3-O-rhamnosyldiglucoside 1 | 13.56 | 773.214  | M+H  | 627, 465, 303 |
| Quercetin 3-O-rhamnosyldiglucoside 2 | 10.76 | 773.2143 | M+H  | 627, 465, 303 |
| Quercetin 3-O-rhamnosyldiglucoside 3 | 9.07  | 773.2145 | M+H  | 627, 465, 303 |
| Quercetin-3-O-glucoside <sup>a</sup> | 10.84 | 465.1026 | M+H  | 303, 153, 149 |
| Quercetin glucoside 1                | 12.53 | 465.103  | M+H  | 303           |
| Quercetin glucoside 2                | 18.62 | 465.103  | M+H  | 303           |
| Quercetin glucoside 3                | 14.11 | 465.1035 | M+H  | 303           |
| Quercetin rutinoside                 | 18.87 | 611.161  | M+H  | 465, 303      |
| Quercetin-diglucoside 1              | 10.42 | 627.1562 | M+H  | 465, 303      |
| Quercetin-diglucoside 2              | 13.71 | 627.1563 | M+H  | 465, 303      |
| Quercetin-diglucoside 3              | 9.58  | 627.1564 | M+H  | 465, 303      |
| Quercetin-diglucoside 4              | 8.86  | 627.1575 | M+H  | 465, 303      |
| Quercetin-diglucoside 5              | 14.07 | 649.1391 | M+Na | 649, 347      |

---

<sup>a</sup> Confirmed by the authentic standards.
